# Supplementary material for: Prognostic significance of C-reactive protein (CRP) and albumin-based biomarker in patients with breast cancer receiving chemotherapy
Source: PeerJ. 2025 May 21;13:e19319. doi: 10.7717/peerj.19319 (PMC12103165; doi:10.7717/peerj.19319)
Supplement: Supplemental Information 1 — The clinical, pathological, biomarkers, survival, and follow up duration data. The raw data consists of both numeric and categorical value. [file peerj-13-19319-s001.xlsx]

## Sheet: Legend
	Code
Age category
<50 years	0
≥50 years	1
Stage category (Disease-free survival)
I-II	0
III	1
Stage category (Progression-free survival)
II-III	0
IV	1
Stage category (Overall survival)
I-II	0
III-IV	1
ER status
Negative	0
Positive	1
PR status
Negative	0
Positive	1
HER2 status
Negative	0
Positive	1
NLR category
≤1.995	0
>1.995	1
PLR category
≤145.5	0
>145.5	1
LMR category
≥0.265	0
<0.265	1
SII category
≤774.8	0
>774.8	1
SIRI category
≤1.11	0
>1.11	1
PIV category
≤331.8	0
>331.8	1
PNI category
≥54.06	0
<54.06	1
CAR category
≤1.5	0
>1.5	1
Disease-free survival
No Event	0
Event	1
3-year Disease-free survival
No Event	0
Event	1
Progression-free survival
No Event	0
Event	1
3-year Progression-free survival
No Event	0
Event	1
Overall survival
No Event	0
Event	1
3-year Overall survival
No Event	0
Event	1

## Sheet: Disease-free survival
Age (years)	Age category	Stage	Stage category	ER status	PR status	HER2 status	NLR	PLR	LMR	SII	SIRI	PIV	PNI	CAR	NLR category	PLR category	LMR category	SII category	SIRI category	PIV category	PNI category	CAR category	Chemo intention	Disease-free survival	3-year Disease-free survival	Follow up duration (months)
48.126	0	3	1	1	1	0	3.00463	150.979	0.178723	910.404	1.0777	326.544	56.3345	1.56587	1	1	1	1	0	0	0	1	Adjuvant	0	0	75.0575
51.1233	1	1	0	1	1	0	1.47696	93.0836	0.225071	511.029	1.23564	427.532	60.7854	3.27488	0	0	1	0	1	1	0	1	Adjuvant	0	0	75.0575
57.2712	1	3	1	0	0	0	0.999508	88.9713	0.166282	234.884	0.438984	103.161	57.6065	1.64189	0	0	1	0	0	0	0	1	Adjuvant	0	0	22.4219
68.126	1	2	0	0	0	1	9.44079	297.368	0.745105	4267.24	10.6923	4832.9	43.4	1.49441	1	1	0	1	1	1	1	0	Adjuvant	0	0	74.8274
56.3342	1	3	1	1	1	1	2.14737	92.4141	0.238596	401.558	1.03675	193.872	59.1175	2.67551	1	0	1	0	0	0	0	1	Adjuvant	1	1	13.611
50.6575	1	3	1	1	1	0	2.47388	124.441	0.169173	823.802	1.11992	372.935	62.3798	1.81429	1	0	1	1	1	1	0	1	Adjuvant	1	1	11.5397
77.5973	1	2	0	0	0	0	1.22179	121.79	0.194879	382.42	0.611921	191.531	57.35	3.12809	0	0	1	0	0	0	0	1	Adjuvant	0	0	69.4685
42.8685	0	3	1	0	0	1	16.5223	1118.3	0.934579	4394.92	3.6729	976.991	54.8893	0.111732	1	1	0	1	1	1	0	0	Adjuvant	1	0	74.4329
49.1836	0	3	1	1	1	1	3.17666	104.721	0.372093	949.821	3.37488	1009.09	59.176		1	0	0	1	1	1	0		Adjuvant	1	0	63.3534
41.5644	0	3	1	0	0	0	2.50272	206.306	0.270916	763.33	1.00239	305.729	53.392	0.732609	1	1	0	0	0	0	1	0	Adjuvant	0	0	73.9068
45.8575	0	3	1	1	1	0	2.69794	184.537	0.253012	887.623	1.21699	400.389	50.3142	0.355072	1	1	1	1	1	1	1	0	Adjuvant	1	1	23.8356
66.9808	1	3	1	0	0	0	1.57588	150.471	0.254438	466.459	0.788757	233.472	54.8358	0.382222	0	1	1	0	0	0	0	0	Adjuvant	1	1	24.0658
37.1507	0	2	0	0	0	0	4.52102	150.419	0.261628	1609.48	2.79942	996.593	60.2336	2.58264	1	1	1	1	1	1	0	1	Adjuvant	0	0	6.31233
47.1014	0	2	0	1	1	0	1.60985	106.818	0.169386	453.977	0.719892	203.01	60.2	0.168085	0	0	1	0	0	0	0	0	Adjuvant	1	0	73.1507
74.6274	1	3	1	1	1	0	3.62587	166.122	0.388889	1171.16	2.74167	885.558	52.5218	7.88318	1	1	0	1	1	1	1	1	Adjuvant	0	0	74.3014
58.4411	1	3	1	0	0	0	1.93118	130.507	0.171521	619.908	0.814725	261.527	60.1982	1.7286	0	0	1	0	0	0	0	1	Adjuvant	1	1	14.0384
53.3753	1	3	1	0	0	1	2.0018	151.597	0.21	674.606	0.9345	314.927	54.015	0.785548	1	1	1	0	0	0	1	0	Adjuvant	1	1	23.9671
63.9205	1	2	0	1	1	0	2.13629	188.367	0.311355	732.749	1.21117	415.432	55.3046	1.89394	1	1	0	0	1	1	0	1	Adjuvant	1	1	24.789
42.6822	0	2	0	1	0	0	0.746269	132.293	0.18595	320.149	0.45	193.05	57.814	0.146635	0	0	1	0	0	0	0	0	Adjuvant	0	0	72.9205
78.0877	1	3	1	0	0	1	0.798226	101.679	0.190687	256.231	0.480532	154.251	52.485	0.392371	0	0	1	0	0	0	1	0	Adjuvant	1	1	24.5918
48.5479	0	2	0	1	1	0	1.66664	101.462	0.186944	508.327	0.936588	285.659			0	0	1	0	0	0			Adjuvant	0	0	74.4
51.3342	1	1	0	1	1	0	3.67808	264.051	0.407216	1460.2	2.25191	894.007	50.1175	13.4178	1	1	0	1	1	1	1	1	Adjuvant	0	0	72.789
47.3918	0	3	1	1	1	0	1.32208	121.892	0.209845	421.745	0.726062	231.614	60.3854	2.08668	0	0	1	0	0	0	0	1	Adjuvant	1	1	23.0795
57.5836	1	3	1	1	1	1	1.94029	116.711	0.18241	770.294	1.20391	477.952	53.4078		0	0	1	0	1	1	1		Adjuvant	0	0	71.6712
56.1644	1	3	1	1	1	0	2.70795	147.541	0.262295	658.033	1.16984	284.27	55.035	0.82265	1	1	1	0	1	0	0	0	Adjuvant	0	0	72.0658
43.3233	0	3	1	0	0	1	1.64881	122.994	0.190751	532.565	0.825954	266.783	52.7307	1.19697	0	0	1	0	0	0	1	0	Adjuvant	1	1	13.874
51.9973	1	3	1	0	0	0	2.50667	168	0.305467	631.68	1.14855	289.436	45.6	1.13648	1	1	0	0	1	0	1	0	Adjuvant	0	0	76.7342
54.8712	1	2	0	1	1	0	1.8324	143.575	0.183263	470.927	0.601101	154.483	58.35	0.562753	0	0	1	0	0	0	0	0	Adjuvant	0	0	70.9479
61.9863	1	3	1	1	1	0	1.39651	184.235	0.161376	784.839	0.68746	386.353	65.2523	0.804	0	1	1	1	0	1	0	0	Adjuvant	1	1	14.2356
58.126	1	3	1	1	0	0	0.967997	87.2664	0.149893	230.383	0.395717	94.1807	59.1364	0.720879	0	0	1	0	0	0	0	0	Adjuvant	1	1	16.7342
54.8438	1	3	1	1	1	0	1.77739	114.149	0.229299	389.249	0.781911	171.238			0	0	1	0	0	0			Adjuvant	0	0	71.4082
49.1534	0	2	0	1	1	0	2.08087	100.479	0.20068	615.938	1.23017	364.13			1	0	1	0	1	1			Adjuvant	0	0	71.5726
49.0959	0	3	1	1	1	0	2.46931	172.497	0.243446	721.039	1.0176	297.14	55.4639	0.774468	1	1	1	0	0	0	0	0	Adjuvant	0	0	69.9616
64.5123	1	2	0	0	0	1	2.20179	125.561	0.243511	616.502	1.19564	334.779	55.45	1.19639	1	0	1	0	1	1	0	0	Adjuvant	1	1	16.274
32.6219	0	3	1	1	1	0	2.22216	115.183	0.298932	471.098	1.22263	259.198			1	0	0	0	1	0			Adjuvant	1	1	35.0466
47.8959	0	1	0	1	0	0	6.95	207.143	0.247929	2015.5	2.41235	699.58			1	1	1	1	1	1			Adjuvant	0	0	69.4685
46.1425	0	2	0	1	1	0	1.16917	113.557	0.163895	395.18	0.570356	192.78	61.3824	0.793548	0	0	1	0	0	0	0	0	Adjuvant	0	0	69.5342
47.263	0	3	1	0	0	0	2.94628	129.752	0.313116	925.132	2.23251	701.01	57.3	0.181416	1	0	0	1	1	1	0	0	Adjuvant	0	0	70.2247
46.5671	0	3	1	1	1	1	1.43229	131.771	0.167672	362.37	0.461098	116.658			0	0	1	0	0	0			Adjuvant	0	0	69.9616
41.5096	0	2	0	1	0	0	2.23932	274.359	0.391752	718.821	1.02639	329.471	51.85	0.0673913	1	1	0	0	0	0	1	0	Adjuvant	0	0	69.5342
43.1123	0	2	0	1	1	0	2.20786	107.058	0.184028	744.05	1.27899	431.021	49.4392	1.4451	1	0	1	0	1	1	1	0	Adjuvant	0	0	68.3836
57.6137	1	2	0	0	0	1	2.69048	205.952	0.29203	930.905	1.31997	456.711	52.3	1.69476	1	1	0	1	1	1	1	1	Adjuvant	1	1	20.0877
52.6219	1	3	1	1	1	0	1.39241	125.316	0.202848	413.544	0.669399	198.811	57.65	0.39738	0	0	1	0	0	0	0	0	Adjuvant	1	1	5.91781
59.7452	1	2	0	0	0	0	1	116.129	0.0904047	396	0.30828	122.079	61.45	1.2027	0	0	1	0	0	0	0	0	Adjuvant	1	1	11.737
50.337	1	3	1	1	1	0	2.35921	159.274	0.189286	691.248	0.8215	240.699	32.898	0.109705	1	1	1	0	0	0	1	0	Adjuvant	0	0	4.6
54.8082	1	3	1	1	1	0	1.70588	122.941	0.155294	356.529	0.450353	94.1238	47.1	0.580311	0	0	1	0	0	0	1	0	Adjuvant	1	1	16.1753
51.8575	1	3	1	1	1	1	2.86547	107.623	0.219605	687.713	1.40328	336.787	52.05	1.20049	1	0	1	0	1	1	1	0	Adjuvant	0	0	69.1068
48.7671	0	3	1	1	0	0	1.57934	80.4428	0.163299	344.295	0.698919	152.364	62.05	0.183505	0	0	1	0	0	0	0	0	Adjuvant	0	0	67.989
59.9836	1	2	0	1	1	0	2.47674	106.395	0.242994	453.244	1.03516	189.433	54	1.70925	1	0	1	0	0	0	1	1	Adjuvant	1	1	24.9534
70.2493	1	3	1	0	0	1	1.42478	109.292	0.348009	351.92	1.12059	276.785	45.9	4.06936	0	0	0	0	1	0	1	1	Adjuvant	1	1	11.0466
48.9041	0	3	1	0	0	0	2.60821	112.687	0.224384	787.679	1.56845	473.671	54.6	1.51456	1	0	1	1	1	1	0	1	Adjuvant	1	1	12
46.2438	0	3	1	1	1	0	2.26316	107.177	0.268033	506.947	1.2678	283.987	55.55	0.0997783	1	0	0	0	1	0	0	0	Adjuvant	0	0	67.9233
56	1	2	0	0	0	1	1.35429	144	0.234754	341.28	0.556368	140.205	58.15	1.01619	0	0	1	0	0	0	0	0	Adjuvant	1	1	16.4384
56.7918	1	1	0	1	1	0	2.37066	127.027	0.209514	779.946	1.28641	423.23	51.55	2.67876	1	0	1	1	1	1	1	1	Adjuvant	0	0	66.7726
42.8466	0	3	1	1	1	0	1.88667	196	0.21376	554.68	0.604941	177.853	52.4		0	1	1	0	0	0	1		Adjuvant	0	0	42
44.7836	0	2	0	1	1	0	1.67606	150.704	0.174169	538.014	0.621783	199.592	59.75	0.95723	0	1	1	0	0	0	0	0	Adjuvant	0	0	12
40.6986	0	2	0	1	0	0	3.31783	274.419	0.371271	1174.51	1.58904	562.521	54.25	0.106695	1	1	0	1	1	1	0	0	Adjuvant	0	0	68.811
50.0438	1	3	1	0	0	1	2.66412	175.573	0.566	612.748	1.97534	454.328	51.25	0.261745	1	1	0	0	1	1	1	0	Adjuvant	1	1	11.7041
52.8849	1	3	1	1	1	0	1.69444	115.806	0.0833333	501.556	0.360917	106.831	56.78	3.18409	0	0	1	0	0	0	0	1	Adjuvant	0	0	65.1616
31.7425	0	3	1	0	0	0	1.39431	84.1463	0.129472	288.622	0.444087	91.9261	59.8	0.202105	0	0	1	0	0	0	0	0	Adjuvant	0	0	58.0932
45.0521	0	2	0	1	1	0	1.63248	162.393	0.202222	620.342	0.772489	293.546	51.9		0	1	1	0	0	0	1		Adjuvant	0	0	65.0959
58.2466	1	2	0	1	1	0	0.723684	71.7105	0.137842	157.763	0.303253	66.1091	50.5	3.12181	0	0	1	0	0	0	1	1	Adjuvant	0	0	62.6959
51.8356	1	2	0	1	1	0	1.76856	116.157	0.243441	470.437	0.985936	262.259	49.25		0	0	1	0	0	0	1		Adjuvant	0	0	63.1562
56.3808	1	3	1	0	0	0	2.03409	146.591	0.228563	524.795	0.818254	211.109	52.2	3.2212	1	1	1	0	0	0	1	1	Adjuvant	1	1	11.8356
56.6082	1	2	0	0	0	0	3.63636	107.867	0.353535	938.182	3.07491	793.327	54.8592	2.09324	1	0	0	1	1	1	0	1	Adjuvant	1	1	22.1589
47.0877	0	3	1	1	1	0	1.42414	115.862	0.144124	478.51	0.595233	199.998	60.1	2.55263	0	0	1	0	0	0	0	1	Adjuvant	0	0	61.7425
53.7233	1	2	0	1	1	0	2.2398	276.02	0.276964	1211.73	1.21587	657.787	48.4	39.3083	1	1	0	1	1	1	1	1	Adjuvant	0	0	63.2877
55.8658	1	3	1	1	1	0	4.46789	341.284	0.412367	1662.06	2.00823	747.061	49.95	3.36404	1	1	0	1	1	1	1	1	Adjuvant	1	1	31.4959
55.9479	1	3	1	0	0	1	3.60563	185.211	0.262014	948.282	1.34151	352.818	53.5	1.41379	1	1	1	1	1	1	1	0	Adjuvant	1	1	29.4575
46.1836	0	3	1	0	0	0	2.57711	134.328	0.308896	695.821	1.60008	432.021	53.95	6.26651	1	0	0	0	1	1	1	1	Adjuvant	0	0	62.7288
51.326	1	1	0	1	0	0	1.99248	210.526	0.0888421	557.895	0.235432	65.9208			0	1	1	0	0	0			Adjuvant	1	0	60.5918
50.7973	1	2	0	1	1		2.79032	207.527	0.283129	1077.06	1.46944	567.204	55.8	0.0537634	1	1	0	1	1	1	0	0	Adjuvant	0	0	61.9726
37.1151	0	3	1	1	1	0	3.95	174.342	0	1046.75	0	0	54.1	0.111828	1	1	1	1	0	0	0	0	Adjuvant	1	0	61.7096
58.5425	1	3	1	1	1	0	2.20087	137.555	0.281004	693.275	1.41626	446.123	57.75	0.425486	1	0	0	0	1	1	0	0	Adjuvant	0	0	61.5123
67.7562	1	2	0	1	1	0	1.01024	69.2833	0.183287	205.078	0.542529	110.133	57.75	1.58933	0	0	1	0	0	0	0	1	Adjuvant	1	1	34.8164
41.5397	0	3	1	1	0	0	1.86705	118.497	0.149272	382.746	0.482148	98.8402	54.55	1.06754	0	0	1	0	0	0	0	0	Adjuvant	1	1	21.9288
43.337	0	2	0	1	1	0	5.25581	196.124	0.471233	1329.72	3.19496	808.324	53.85	0.386076	1	1	0	1	1	1	1	0	Adjuvant	1	0	62.926
47.926	0	2	0	1	1	0	8.14141	270.27	0.545455	1612	3.25331	644.155	47.263	0.100917	1	1	0	1	1	1	1	0	Adjuvant	0	0	62.0384
63.1534	1	3	1	0	0	1	0.95057	124.715	0.323194	311.787	0.807985	265.019	52.85	1.13854	0	0	0	0	0	0	1	0	Adjuvant	0	0	13.4137
65.8685	1	3	1	1	1	0	1.82051	124.615	0.444605	442.385	1.57835	383.539	55.15	2.69824	0	0	0	0	1	1	0	1	Adjuvant	1	0	57.6658
61.4493	1	3	1	0	0	1	3.46995	192.896	0.0638033	1224.89	0.405151	143.018	51.45	1.62648	1	1	1	1	0	0	1	1	Adjuvant	1	1	6.24658
51.3945	1	3	1	1	1	0	1.62717	126.916	0.263006	493.032	1.0217	309.575	59.637	1.80084	0	0	1	0	0	0	0	1	Adjuvant	1	1	11.2438
56.8658	1	2	0	1	1	0	1.45506	71.6292	0.409382	371.039	2.1206	540.753	60.8	7.54651	0	0	0	0	1	1	0	1	Adjuvant	1	1	23.8356
61.1425	1	3	1	0	0	0	1.73457	178.395	0.194198	501.29	0.545695	157.706	54.2	0.0932755	0	1	1	0	0	0	0	0	Adjuvant	1	0	58.4548
53.0877	1	2	0	0	0	0	2.11458	126.562	0.145063	513.844	0.588954	143.116	54.3	0.210291	1	0	1	0	0	0	0	0	Adjuvant	0	0	57.2055
51.8658	1	2	0	0	0	1	1.70455	115.909	0.245255	434.659	0.919705	234.525	58.1	4.78556	0	0	1	0	0	0	0	1	Adjuvant	0	0	57.4356
48.3288	0	2	0	0	0	0	5.32812	318.75	1.19995	1086.94	4.09184	834.735	50.7	19.6758	1	1	0	1	1	1	1	1	Adjuvant	0	0	58.2904
47.4137	0	3	1	1	1	0	2.31624	148.291	0.307675	803.735	1.6676	578.657	63.3	0.0193798	1	1	0	1	1	1	0	0	Adjuvant	1	1	20.1863
41.526	0	2	0	1	1	0	1.69663	130.899	0.255994	395.315	0.773103	180.133	59	0.0998004	0	0	1	0	0	0	0	0	Adjuvant	0	0	55.5945
39.1014	0	3	1	0	0	0	2.656	270.4	0.32768	897.728	1.0879	367.709	54.25	0.0208333	1	1	0	1	0	1	0	0	Adjuvant	0	0	56.0548
52.8301	1	2	0	1	1	0	2.42683	217.683	0.0743963	866.378	0.296097	105.707			1	1	1	1	0	0			Adjuvant	1	1	12.6247
41.2849	0	2	0	0	0	0	5.5375	412.5	0.503212	1827.37	2.22923	735.646			1	1	0	1	1	1			Adjuvant	0	0	54.8055
37.274	0	2	0	1	1	1	3.89542	167.32	0.954425	997.229	5.68837	1456.22	56.85	0.0447154	1	1	0	1	1	1	0	0	Adjuvant	0	0	56.0548
45.4411	0	2	0	1	1	0	1.24121	121.608	0.271146	300.372	0.66973	162.075	47.85	1.27177	0	0	0	0	0	0	1	0	Adjuvant	0	0	54.8384
56.7151	1	2	0	0	0	1	2.8009	247.059	0.199059	1529.29	1.23217	672.767	57.85	0.211538	1	1	1	1	1	1	0	0	Adjuvant	1	1	17.6219
39.1753	0	2	0	0	0	0	5.56818	523.864	0.508295	2566.93	2.49065	1148.19	54.8	0.196429	1	1	0	1	1	1	0	0	Adjuvant	0	0	55.2986
66.4658	1	3	1	1	1	0	1.85287	103.741	0.168566	770.793	1.25245	521.018	69.65	6.53024	0	0	1	0	1	1	0	1	Adjuvant	0	0	52.7014
58.9151	1	2	0	0	0	1	1.56869	107.987	0.123498	530.217	0.606377	204.955	64.85	0.686992	0	0	1	0	0	0	0	0	Adjuvant	0	0	51.4192
57.5507	1	1	0	1	1		1.70647	103.98	0.208373	356.652	0.71472	149.376	53.65	1.8578	0	0	1	0	0	0	1	1	Adjuvant	0	0	48.789
44.2438	0	3	1	0	0	1	1.74227	153.608	0.13268	519.196	0.44846	133.641	56.7	0.0212766	0	1	1	0	0	0	0	0	Adjuvant	1	1	12
43.4	0	3	1	1	1	1	3.42775	154.913	0.346266	918.636	2.05336	550.3	58.15	2.73939	1	1	0	1	1	1	0	1	Adjuvant	1	1	18.9699
61.0411	1	3	1	1	1	0	3.48503	192.814	0.281317	1122.18	1.63727	527.2	58.15	0.427711	1	1	0	1	1	1	0	0	Adjuvant	1	0	51.6822
35.674	0	3	1	0	0	0	1.77778	134.343	0.258222	472.889	0.908942	241.779	46.5	0.13388	0	0	1	0	0	0	1	0	Adjuvant	0	0	54.4438
57.1123	1	3	1	1	1	1	1.86869	160.101	0.272727	592.374	1.00909	319.882	53.8	5.40319	0	1	0	0	0	0	1	1	Adjuvant	1	1	17.3589
49.8137	0	3	1	0	0	1	2.10843	167.47	0.28453	586.145	0.995855	276.848	52.3	0.377273	1	1	0	0	0	0	1	0	Adjuvant	1	1	11.5397
49.3123	0	3	1	1	1	1	1.15068	109.589	0.437361	276.164	1.10215	264.516	50.35	0.0659898	0	0	0	0	0	0	1	0	Adjuvant	0	0	48.6575
66.7397	1	2	0	1	1	0	2.75248	150	0.261386	834	1.45331	440.352	56.1	0.00869565	1	1	1	1	1	1	0	0	Adjuvant	0	0	47.211
57.3507	1	2	0	0	0	1	3.29213	185.955	0.1395	1089.7	0.81747	270.583	57.9	1.87959	1	1	1	1	0	0	0	1	Adjuvant	1	1	13.6767
54.5534	1	2	0	0	0	0	3.95455	192.045	0.433432	668.318	1.50834	254.91	47.3	0.909091	1	1	0	0	1	0	1	0	Adjuvant	0	0	49.3479
58.9178	1	3	1	1	0	1	4.09804	181.046	0.477386	1135.16	2.99321	829.119	52.65	0.0644444	1	1	0	1	1	1	1	0	Adjuvant	1	1	7.59452
51.6521	1	3	1	0	0	0	2.95935	165.854	0.316333	603.707	1.15145	234.896	52.15	0.132609	1	1	0	0	1	0	1	0	Adjuvant	0	0	46.126
44.5671	0	3	1	1	1	0	6.75	500	0.694895	2565	3.56481	1354.63	55	0.0742188	1	1	0	1	1	1	0	0	Adjuvant	0	0	47.0466
36.6466	0	2	0	0	0	0	3.63393	254.464	0.484732	1035.67	1.97286	562.265	41.3		1	1	0	1	1	1	1		Adjuvant	0	0	32.811
49.5397	0	2	0	1	1	1	2.86885	201.639	0.270361	705.738	0.946262	232.781	46.1	0.545	1	1	0	0	0	0	1	0	Adjuvant	0	0	45.3041
55.5342	1	3	1	1	1	0	1.52874	162.069	0.168659	646.655	0.672949	284.658	61.05		0	1	1	0	0	0	0		Adjuvant	1	1	18.9699
44.4219	0	3	1	1	1	0	2.74219	207.812	0.242914	729.422	0.852628	226.799	49.4	0.0255814	1	1	1	0	0	0	1	0	Adjuvant	0	0	6.3
47.6603	0	1	0	0	0	0	4.51832	110.995	0.240634	957.885	2.07667	440.253	48.15	0.181347	1	0	1	1	1	1	1	0	Adjuvant	0	0	47.0795
69.1068	1	3	1	0	0	1	2.61146	162.42	0.336306	665.924	1.37885	351.608	50.85	0.87907	1	1	0	0	1	1	1	0	Adjuvant	1	1	19.8247
57.7315	1	3	1	0	0	1	2.36923	111.154	0.137385	684.708	0.846289	244.578	55.6	5	1	0	1	0	0	0	0	1	Adjuvant	1	1	8.08767
58.2356	1	2	0	1	1	0	3.95968	227.419	0.379355	1116.63	1.86263	525.262	53.2		1	1	0	1	1	1	1		Adjuvant	1	1	4.76712
46.0603	0	2	0	1	1	0	0.873112	93.6556	0.12329	270.665	0.356308	110.456	68.05	0.260194	0	0	1	0	0	0	0	0	Adjuvant	0	0	39.7808
61.6137	1	3	1	0	0	1	1.23446	85.5932	0.129266	374.042	0.56489	171.162	61.6	1.59909	0	0	1	0	0	0	0	1	Adjuvant	1	1	3.78082
40.9863	0	3	1	1	0	1	5.64706	430.588	0.495012	2066.82	2.37606	869.637	45.25	0.470732	1	1	0	1	1	1	1	0	Adjuvant	0	0	39.5836
46.7315	0	3	1	1	0	0	3.29412	356.303	0.394773	1396.71	1.54751	656.144	48.75	0.691589	1	1	0	1	1	1	1	0	Adjuvant	0	0	41.4904
56.1342	1	1	0	0	0	0	3.73585	275.472	0.700132	1090.87	2.77252	809.577	51.3	1.4913	1	1	0	1	1	1	1	0	Adjuvant	0	0	26.3014
46.4685	0	3	1	1	1	1	5.83784	420.27	0.433662	1815.57	1.87342	582.634	44.7	0.431707	1	1	0	1	1	1	1	0	Adjuvant	0	0	36.3
58.4192	1	3	1	1	1	0	4.38298	450	0.327064	1854	1.3475	569.994	47.7	3.1814	1	1	0	1	1	1	1	1	Adjuvant	0	0	37
32.0575	0	2	0	0	0	1	3.5082	219.126	0.26929	1406.79	1.72884	693.265	56.55	2.01477	1	1	0	1	1	1	0	1	Adjuvant	0	0	36
63.3452	1	2	0	0	0	0	5.26812	281.884	0.44087	2049.3	3.20512	1246.79	47.4	0.950617	1	1	0	1	1	1	1	0	Adjuvant	0	0	31.1014

## Sheet: Progression-free survival
Age (years)	Age category	Stage	Stage category	ER status	PR status	HER2 status	NLR	PLR	LMR	SII	SIRI	PIV	PNI	CAR	NLR category	PLR category	LMR category	SII category	SIRI category	PIV category	PNI category	CAR category	Chemo intention	Progression-free survival	3-year Progression-free survival	Follow up duration (months)
35.0493	0	4	1	1	1	0	3.04065	118.699	0.284573	887.87	2.12861	621.553	53	10.9263	1	0	0	1	1	1	1	1	Palliative	1	1	11.3096
47.9616	0	4	1	0	0	1	1.96751	95.3069	0.267801	519.422	1.45952	385.313	56.85	2.01163	0	0	0	0	1	1	0	1	Palliative	1	1	3.09041
46.537	0	4	1	0	0	0	3.0491	138.91	0.251121	734.832	1.32843	320.152	55.2747	7.45708	1	0	1	0	1	0	0	1	Palliative	0	0	57.1726
50.3068	1	3	1	0	0	1	1.96703	197.802	0.163648	708.132	0.585861	210.91	42	2.41033	0	1	1	0	0	0	1	1	Neoadjuvant	0	0	68.8438
60.6986	1	3	1	0	0	0	2.73964	231.361	0.380639	1071.2	1.76236	689.082	36.25	4.22662	1	1	0	1	1	1	1	1	Neoadjuvant	1	1	7.36438
45.3945	0	4	1	1	1	0	3.47647	204.118	0.381376	1206.34	2.25393	782.115	39.3	3.38636	1	1	0	1	1	1	1	1	Palliative	1	1	16.7671
54.9479	1	4	1	1	0	0	1.63899	48.3755	0.262729	219.625	1.19279	159.834	61.95		0	0	1	0	1	0	0		Palliative	1	1	8.1863
50.5973	1	4	1	1	1	1	1.92462	171.357	0.130854	656.296	0.501172	170.9	44.05	0.190616	0	1	1	0	0	0	1	0	Palliative	1	1	25.4466
55.2932	1	4	1	1	0	0	2.38865	150.218	0.204437	821.694	1.11827	384.684	52.25	2.09559	1	1	1	1	1	1	1	1	Palliative	1	1	14.2356
59.7534	1	4	1	0	0	0	6.0274	359.589	0.358356	3164.38	3.15353	1655.61	43.2		1	1	0	1	1	1	1		Palliative	1	1	1.11781
58.7205	1	4	1				4.09692	170.044	0.576189	1581.41	5.35856	2068.4	58.45		1	1	0	1	1	1	0		Palliative	1	1	10.2
42.6055	0	4	1	0	0	1	3.40687	166.268	0.209302	1042.5	1.31233	401.572	50.502		1	1	1	1	1	1	1		Palliative	1	1	12.1973
45.5151	0	4	1	1	0	0	9.21739	215.528	1.16065	3198.43	17.224	5976.72	42.15		1	1	0	1	1	1	1		Palliative	1	1	7.98904
47.1178	0	4	1	1	1	0	2.05584	73.9029	0.283276	226.143	0.866826	95.3509	44.0422		1	0	0	0	0	0	1		Palliative	1	1	4.27397
48.5397	0	4	1	1	1	0	5.07143	99.2604	0.428571	517.286	2.23346	227.813	30.538		1	0	0	0	1	0	1		Palliative	1	1	3.78082
77.8548	1	4	1				2.35393	186.517	0.319843	781.506	1.34014	444.927	50.4		1	1	0	1	1	1	1		Palliative	1	1	3.74795
42.9452	0	4	1	0	0	1	4.14168	79.5306	0.355932	757.927	3.39203	620.742	51.105	0.765152	1	0	0	0	1	1	1	0	Palliative	1	1	25.7425
42.0904	0	4	1	1	1	0	3.36	163.333	0.25164	823.2	1.26827	310.725	42.6	1.60114	1	1	1	1	1	0	1	1	Palliative	0	0	69.7973
46.9014	0	4	1	1	1	1	3.75444	261.01	0.478022	2286.45	4.18747	2550.17	40.5662	22.3149	1	1	0	1	1	1	1	1	Palliative	1	1	5.6
45.6466	0	4	1	1	0	0	1.7781	156.074	0.212766	778.807	1.0617	465.026	55.5318	2.53735	0	1	1	1	0	1	0	1	Palliative	1	1	4.99726
51.4301	1	3	1	0	0	0	3.1231	250.836	0.251121	1427.25	1.42888	652.998			1	1	1	1	1	1			Neoadjuvant	1	1	0.920548
43.4438	0	4	1				11.9365	171.429	0.568667	2578.29	8.55275	1847.39	35.4		1	1	0	1	1	1	1		Palliative	1	1	4.10959
61.3068	1	4	1	1	0	1	1.84619	139.077	0.279221	524.319	1.05266	298.956	46.0102	3.48045	0	0	0	0	0	0	1	1	Palliative	1	1	19.0356
40.9315	0	3	1	0	0	1	3.87591	205.839	0.578905	1093.01	3.07399	866.864	37.35	1.91475	1	1	0	1	1	1	1	1	Neoadjuvant	1	1	6.04932
45.4986	0	4	1	1	1	0	3.26923	278.205	0.412359	709.423	1.05152	228.179	38.1	1.61988	1	1	0	0	0	0	1	1	Palliative	1	1	10.6849
45.463	0	4	1	1	1	1	4.48	184.571	0.28616	1447.04	2.24349	724.649	41.75	8.84242	1	1	0	1	1	1	1	1	Palliative	0	0	13.7425
56.063	1	4	1	1	0	0	2.93233	218.797	0.338391	853.308	1.31972	384.04	51.15	0.611236	1	1	0	1	1	1	1	0	Palliative	1	1	23.5068
54.4959	1	3	1	1	1	0	2.16892	263.514	0.161007	845.878	0.516832	201.564	44.8	32.2888	1	1	1	1	0	0	1	1	Neoadjuvant	0	0	14.2356
63.2082	1	4	1	1	1	0	0.944444	70.915	0.166833	204.944	0.482148	104.626	57.9	2.52582	0	0	1	0	0	0	0	1	Palliative	1	1	13.3151
42.8904	0	4	1	1	1	1	1.91716	211.243	0.214615	684.426	0.695354	248.241	50.65	3.72275	0	1	1	0	0	0	1	1	Palliative	1	1	14.9918
49.874	0	4	1	0	0	1	7.85	633.75	0.846075	3979.95	5.31335	2693.87			1	1	0	1	1	1			Palliative	1	1	1.70959
57.4822	1	4	1	1	1	0	2.70229	116.794	0.381344	413.45	1.34996	206.543	41.15		1	0	0	0	1	0	1		Palliative	1	1	15.8466
59.1397	1	3	1	1	1	0	2.63158	215.263	0.259368	1076.32	1.29684	530.408	46.6	1.25876	1	1	1	1	1	1	1	0	Neoadjuvant	1	1	15.7151
49.3863	0	2	0	1	1	0	2.53368	209.326	0.301078	1023.61	1.47227	594.797	52.05	0.641509	1	1	0	1	1	1	1	0	Neoadjuvant	1	1	22.3562
53.2575	1	4	1	1	1	0	3.02273	247.727	0.282182	1317.91	1.50121	654.526	51	2.32938	1	1	0	1	1	1	1	1	Palliative	1	1	9.1726
43.3644	0	4	1	1	1	0	3.38468	233.246	0.320522	907.095	1.24651	334.065	35.545		1	1	0	1	1	1	1		Palliative	1	1	0.493151
62.8959	1	4	1	1	1	0	1.62595	219.084	0.410634	466.649	0.87465	251.024	47.55	0.709756	0	1	0	0	0	0	1	0	Palliative	1	1	6.18082
63.674	1	4	1	1	1	1	2.59538	227.746	0.44511	1022.58	1.99854	787.426	43.25	20.8931	1	1	0	1	1	1	1	1	Palliative	1	1	7.43014
51.0384	1	4	1	1	1	0	1.86624	242.675	0.249076	711.038	0.729794	278.051	43.25	3.25424	0	1	1	0	0	0	1	1	Palliative	1	1	6.6411
61.3041	1	4	1	0	0	0	4.39412	242.941	0.328706	1814.77	2.45543	1014.09	45		1	1	0	1	1	1	1		Palliative	1	1	2.46575
37.8466	0	4	1	0	0	0	1.72766	117.447	0.221055	476.834	0.897485	247.706	55.95	0	0	0	1	0	0	0	0	0	Palliative	1	1	13.7425
44.3096	0	4	1	0	1	1	5.12977	74.0458	0.458771	497.588	3.08294	299.045	34.25		1	0	0	0	1	0	1		Palliative	1	1	1.15068
61.8575	1	4	1	1	1		1.05067	79.4667	0.185544	313.099	0.731043	217.851	66.35	0.972689	0	0	1	0	0	0	0	0	Palliative	1	1	9.92877
44.6247	0	3	1	1	1	0	3.75862	280.172	0.481672	1221.55	2.10009	682.53	52.9	0.280255	1	1	0	1	1	1	1	0	Neoadjuvant	1	1	11.737
72.3781	1	4	1	0	0	0	2.64754	156.557	0.393721	505.68	1.27172	242.898	44.1		1	1	0	0	1	0	1		Palliative	0	0	59.1781
45.2521	0	4	1	1	1	0	2.79487	114.359	0.266174	623.256	1.45065	323.495	55.45	2.10503	1	0	0	0	1	0	0	1	Palliative	1	1	15.5178
48.7808	0	3	1	0	0	0	3.60403	134.564	0.106235	1445.21	1.14096	457.526	52.5	10.4707	1	0	1	1	1	1	1	1	Neoadjuvant	1	0	58.2575
60.7288	1	4	1	0	0	1	1.88462	126.282	0.318981	371.269	0.937803	184.747	49.9	0.931116	0	0	0	0	0	0	1	0	Palliative	0	0	58.3562
70.8384	1	4	1	0	0	1	0.530792	90.6158	0.125252	164.015	0.226706	70.0523	65.35	1.91925	0	0	1	0	0	0	0	1	Palliative	1	1	12.1644
52.4685	1	4	1	1	1	0	1.50909	97.7273	0.222909	324.455	0.740058	159.113	41.1	6.42525	0	0	1	0	0	0	1	1	Palliative	1	1	6.41096
39.1836	0	4	1	1	1	1	3.22124	223.009	0.186956	811.752	0.680519	171.491	38.75	1.81571	1	1	1	1	0	0	1	1	Palliative	1	1	5.19452
70.2384	1	4	1	0	0	1	3.37342	195.57	0.264532	1042.39	1.40995	435.676	45.8		1	1	1	1	1	1	1		Palliative	0	0	9.00822
55.863	1	4	1	1	0	0	3.35238	367.619	0.3984	1294.02	1.40237	541.314	55.75	2.33465	1	1	0	1	1	1	0	1	Palliative	1	1	32.4493
55.4548	1	4	1	0	0	1	2.45455	191.818	0.280391	517.909	0.757055	159.739	49.8		1	1	0	0	0	0	1		Palliative	1	1	8.1863
33.0795	0	3	1	0	0	0	2.15979	157.216	0.221361	658.737	0.927502	282.888	58.9	2.6626	1	1	1	0	0	0	0	1	Neoadjuvant	1	1	12.4932
43.2575	0	3	1	1	1	0	1.96262	144.393	0.239565	606.449	1.00617	310.908	56.7	0.326087	0	0	1	0	0	0	0	0	Neoadjuvant	0	0	47.7041
55.6301	1	2	0	1	1	0	2.46919	138.863	0.317896	723.474	1.65624	485.277	50.55	3.7225	1	0	0	0	1	1	1	1	Neoadjuvant	0	0	47.4082
39.0603	0	4	1	0	0	1	8.55224	489.552	1.42351	2805.13	8.1567	2675.4	39.35	5.08889	1	1	0	1	1	1	1	1	Palliative	1	1	8.84384
47.6767	0	4	1	0	0	1	2.00542	204.065	0.214276	1510.08	1.58565	1193.99	43.45	1.824	1	1	1	1	1	1	1	1	Palliative	1	1	6.37808
26.4082	0	4	1	1	1	0	2.02395	254.491	0.346707	860.18	1.17187	498.044	43.55		1	1	0	1	1	1	1		Palliative	1	1	0.690411
57.6548	1	4	1	1	1	0	2.15102	120.816	0.151816	636.702	0.800072	236.821	52.25	0.505	1	0	1	0	0	0	1	0	Palliative	1	1	16.1425
58.0466	1	4	1	1	0	0	2.81818	38.2328	0.361088	152.182	1.43727	77.6127	54.162	7.8811	1	0	0	0	1	0	0	1	Palliative	1	1	15.8795
38.2	0	4	1	1	1	1	3.80612	275.51	0.237041	1027.65	0.884162	238.724	52.9	0.0520833	1	1	1	1	0	0	1	0	Palliative	1	1	9.92877
48.2795	0	4	1	1	1	0	2.73684	125.506	0.270713	848.421	1.83002	567.305	49.55	2.42204	1	0	0	1	1	1	1	1	Palliative	1	1	2.86027
69.1644	1	4	1	1	1	1	2.01653	133.058	0.241021	649.322	1.17618	378.73	50.1	0.628947	1	0	1	0	1	1	1	0	Palliative	1	1	5.09589
61.3808	1	3	1	0	0	1	3.56667	188	0.3129	1005.8	1.67402	472.072	55.5	0.95	1	1	0	1	1	1	0	0	Neoadjuvant	1	1	26.4329
51.4986	1	4	1	1	1	0	2.55	57.5356	0.75	288.15	3.75615	424.445	50.82	4.90732	1	0	0	0	1	1	1	1	Palliative	1	1	6.08219
55.2904	1	4	1	1	1	0	3.37634	255.914	0.298742	803.57	0.93805	223.256	50.65		1	1	0	1	0	0	1		Palliative	1	1	19.463
54.2411	1	4	1	1	0	0	5.54839	229.032	0.593129	2363.61	6.12109	2607.59	42.3	15.2091	1	1	0	1	1	1	1	1	Palliative	0	0	8.02192
52.1808	1	4	1	1	1	1	7.86842	889.474	0.287368	2659.53	0.859232	290.42	46.9	1.11333	1	1	0	1	0	0	1	0	Palliative	0	0	37.5123
45.1014	0	2	0	1	1	0	3.52525	289.899	0.495778	1011.75	1.73026	496.586	47.95	4.47674	1	1	0	1	1	1	1	1	Neoadjuvant	0	0	36
43.4658	0	3	1	1	1	0	3.45205	313.699	0.254658	1581.04	1.28347	587.831	57.2	0.653307	1	1	1	1	1	1	0	0	Neoadjuvant	0	0	36.3
61.3479	1	3	1	0	0	0	3.7875	191.25	0.353844	1158.97	2.14429	656.154			1	1	0	1	1	1			Neoadjuvant	1	1	4.89863

## Sheet: Overall survival
Age (years)	Age category	Stage	Stage category	ER status	PR status	HER2 status	NLR	PLR	LMR	SII	SIRI	PIV	PNI	CAR	NLR category	PLR category	LMR category	SII category	SIRI category	PIV category	PNI category	CAR category	Chemo intention	Overall survival	3-year Overall survival	Follow up duration (months)
48.126	0	3	1	1	1	0	3.00463	150.979	0.178723	910.404	1.0777	326.544	56.3345	1.56587	1	1	1	1	0	0	0	1	Adjuvant	0	0	75.0575
51.1233	1	1	0	1	1	0	1.47696	93.0836	0.225071	511.029	1.23564	427.532	60.7854	3.27488	0	0	1	0	1	1	0	1	Adjuvant	0	0	75.0575
57.2712	1	3	1	0	0	0	0.999508	88.9713	0.166282	234.884	0.438984	103.161	57.6065	1.64189	0	0	1	0	0	0	0	1	Adjuvant	0	0	22.4219
35.0493	0	4	1	1	1	0	3.04065	118.699	0.284573	887.87	2.12861	621.553	53	10.9263	1	0	0	1	1	1	1	1	Palliative	1	1	12.6575
68.126	1	2	0	0	0	1	9.44079	297.368	0.745105	4267.24	10.6923	4832.9	43.4	1.49441	1	1	0	1	1	1	1	0	Adjuvant	0	0	74.8274
47.9616	0	4	1	0	0	1	1.96751	95.3069	0.267801	519.422	1.45952	385.313	56.85	2.01163	0	0	0	0	1	1	0	1	Palliative	1	1	13.7096
46.537	0	4	1	0	0	0	3.0491	138.91	0.251121	734.832	1.32843	320.152	55.2747	7.45708	1	0	1	0	1	0	0	1	Palliative	0	0	59.474
56.3342	1	3	1	1	1	1	2.14737	92.4141	0.238596	401.558	1.03675	193.872	59.1175	2.67551	1	0	1	0	0	0	0	1	Adjuvant	1	1	35.8356
50.6575	1	3	1	1	1	0	2.47388	124.441	0.169173	823.802	1.11992	372.935	62.3798	1.81429	1	0	1	1	1	1	0	1	Adjuvant	1	1	30.5425
77.5973	1	2	0	0	0	0	1.22179	121.79	0.194879	382.42	0.611921	191.531	57.35	3.12809	0	0	1	0	0	0	0	1	Adjuvant	0	0	69.4685
42.8685	0	3	1	0	0	1	16.5223	1118.3	0.934579	4394.92	3.6729	976.991	54.8893	0.111732	1	1	0	1	1	1	0	0	Adjuvant	0	0	74.4329
49.1836	0	3	1	1	1	1	3.17666	104.721	0.372093	949.821	3.37488	1009.09	59.176		1	0	0	1	1	1	0		Adjuvant	1	0	63.3534
50.3068	1	3	1	0	0	1	1.96703	197.802	0.163648	708.132	0.585861	210.91	42	2.41033	0	1	1	0	0	0	1	1	Neoadjuvant	0	0	68.8438
41.5644	0	3	1	0	0	0	2.50272	206.306	0.270916	763.33	1.00239	305.729	53.392	0.732609	1	1	0	0	0	0	1	0	Adjuvant	0	0	73.9068
45.8575	0	3	1	1	1	0	2.69794	184.537	0.253012	887.623	1.21699	400.389	50.3142	0.355072	1	1	1	1	1	1	1	0	Adjuvant	1	1	33.0082
60.6986	1	3	1	0	0	0	2.73964	231.361	0.380639	1071.2	1.76236	689.082	36.25	4.22662	1	1	0	1	1	1	1	1	Neoadjuvant	1	0	37.6767
66.9808	1	3	1	0	0	0	1.57588	150.471	0.254438	466.459	0.788757	233.472	54.8358	0.382222	0	1	1	0	0	0	0	0	Adjuvant	1	1	24.8219
37.1507	0	2	0	0	0	0	4.52102	150.419	0.261628	1609.48	2.79942	996.593	60.2336	2.58264	1	1	1	1	1	1	0	1	Adjuvant	0	0	6.31233
45.3945	0	4	1	1	1	0	3.47647	204.118	0.381376	1206.34	2.25393	782.115	39.3	3.38636	1	1	0	1	1	1	1	1	Palliative	1	1	19.8247
54.9479	1	4	1	1	0	0	1.63899	48.3755	0.262729	219.625	1.19279	159.834	61.95		0	0	1	0	1	0	0		Palliative	1	1	14.1041
47.1014	0	2	0	1	1	0	1.60985	106.818	0.169386	453.977	0.719892	203.01	60.2	0.168085	0	0	1	0	0	0	0	0	Adjuvant	0	0	73.1507
50.5973	1	4	1	1	1	1	1.92462	171.357	0.130854	656.296	0.501172	170.9	44.05	0.190616	0	1	1	0	0	0	1	0	Palliative	1	0	53.5233
55.2932	1	4	1	1	0	0	2.38865	150.218	0.204437	821.694	1.11827	384.684	52.25	2.09559	1	1	1	1	1	1	1	1	Palliative	1	1	23.9014
74.6274	1	3	1	1	1	0	3.62587	166.122	0.388889	1171.16	2.74167	885.558	52.5218	7.88318	1	1	0	1	1	1	1	1	Adjuvant	0	0	74.3014
58.4411	1	3	1	0	0	0	1.93118	130.507	0.171521	619.908	0.814725	261.527	60.1982	1.7286	0	0	1	0	0	0	0	1	Adjuvant	0	0	75.5507
59.7534	1	4	1	0	0	0	6.0274	359.589	0.358356	3164.38	3.15353	1655.61	43.2		1	1	0	1	1	1	1		Palliative	1	1	2.56438
53.3753	1	3	1	0	0	1	2.0018	151.597	0.21	674.606	0.9345	314.927	54.015	0.785548	1	1	1	0	0	0	1	0	Adjuvant	1	1	24.6247
58.7205	1	4	1				4.09692	170.044	0.576189	1581.41	5.35856	2068.4	58.45		1	1	0	1	1	1	0		Palliative	0	0	10.4548
63.9205	1	2	0	1	1	0	2.13629	188.367	0.311355	732.749	1.21117	415.432	55.3046	1.89394	1	1	0	0	1	1	0	1	Adjuvant	0	0	73.9397
42.6822	0	2	0	1	0	0	0.746269	132.293	0.18595	320.149	0.45	193.05	57.814	0.146635	0	0	1	0	0	0	0	0	Adjuvant	0	0	72.9205
78.0877	1	3	1	0	0	1	0.798226	101.679	0.190687	256.231	0.480532	154.251	52.485	0.392371	0	0	1	0	0	0	1	0	Adjuvant	1	1	24.5918
48.5479	0	2	0	1	1	0	1.66664	101.462	0.186944	508.327	0.936588	285.659			0	0	1	0	0	0			Adjuvant	0	0	74.4
51.3342	1	1	0	1	1	0	3.67808	264.051	0.407216	1460.2	2.25191	894.007	50.1175	13.4178	1	1	0	1	1	1	1	1	Adjuvant	0	0	72.789
42.6055	0	4	1	0	0	1	3.40687	166.268	0.209302	1042.5	1.31233	401.572	50.502		1	1	1	1	1	1	1		Palliative	1	1	29.589
45.5151	0	4	1	1	0	0	9.21739	215.528	1.16065	3198.43	17.224	5976.72	42.15		1	1	0	1	1	1	1		Palliative	1	1	8.1863
47.3918	0	3	1	1	1	0	1.32208	121.892	0.209845	421.745	0.726062	231.614	60.3854	2.08668	0	0	1	0	0	0	0	1	Adjuvant	1	1	35.5068
57.5836	1	3	1	1	1	1	1.94029	116.711	0.18241	770.294	1.20391	477.952	53.4078		0	0	1	0	1	1	1		Adjuvant	0	0	71.6712
47.1178	0	4	1	1	1	0	2.05584	73.9029	0.283276	226.143	0.866826	95.3509	44.0422		1	0	0	0	0	0	1		Palliative	1	1	4.27397
56.1644	1	3	1	1	1	0	2.70795	147.541	0.262295	658.033	1.16984	284.27	55.035	0.82265	1	1	1	0	1	0	0	0	Adjuvant	0	0	72.0658
48.5397	0	4	1	1	1	0	5.07143	99.2604	0.428571	517.286	2.23346	227.813	30.538		1	0	0	0	1	0	1		Palliative	1	1	3.78082
77.8548	1	4	1				2.35393	186.517	0.319843	781.506	1.34014	444.927	50.4		1	1	0	1	1	1	1		Palliative	1	1	3.74795
43.3233	0	3	1	0	0	1	1.64881	122.994	0.190751	532.565	0.825954	266.783	52.7307	1.19697	0	0	1	0	0	0	1	0	Adjuvant	0	0	72.5589
51.9973	1	3	1	0	0	0	2.50667	168	0.305467	631.68	1.14855	289.436	45.6	1.13648	1	1	0	0	1	0	1	0	Adjuvant	0	0	76.7342
42.9452	0	4	1	0	0	1	4.14168	79.5306	0.355932	757.927	3.39203	620.742	51.105	0.765152	1	0	0	0	1	1	1	0	Palliative	1	1	15.4192
54.8712	1	2	0	1	1	0	1.8324	143.575	0.183263	470.927	0.601101	154.483	58.35	0.562753	0	0	1	0	0	0	0	0	Adjuvant	0	0	70.9479
42.0904	0	4	1	1	1	0	3.36	163.333	0.25164	823.2	1.26827	310.725	42.6	1.60114	1	1	1	1	1	0	1	1	Palliative	0	0	70.5205
46.9014	0	4	1	1	1	1	3.75444	261.01	0.478022	2286.45	4.18747	2550.17	40.5662	22.3149	1	1	0	1	1	1	1	1	Palliative	1	1	10.5
61.9863	1	3	1	1	1	0	1.39651	184.235	0.161376	784.839	0.68746	386.353	65.2523	0.804	0	1	1	1	0	1	0	0	Adjuvant	0	0	70.7507
58.126	1	3	1	1	0	0	0.967997	87.2664	0.149893	230.383	0.395717	94.1807	59.1364	0.720879	0	0	1	0	0	0	0	0	Adjuvant	1	0	55.7918
54.8438	1	3	1	1	1	0	1.77739	114.149	0.229299	389.249	0.781911	171.238			0	0	1	0	0	0			Adjuvant	0	0	71.4082
45.6466	0	4	1	1	0	0	1.7781	156.074	0.212766	778.807	1.0617	465.026	55.5318	2.53735	0	1	1	1	0	1	0	1	Palliative	1	1	29.1945
49.1534	0	2	0	1	1	0	2.08087	100.479	0.20068	615.938	1.23017	364.13			1	0	1	0	1	1			Adjuvant	0	0	71.5726
51.4301	1	3	1	0	0	0	3.1231	250.836	0.251121	1427.25	1.42888	652.998			1	1	1	1	1	1			Neoadjuvant	1	1	35.9342
43.4438	0	4	1				11.9365	171.429	0.568667	2578.29	8.55275	1847.39	35.4		1	1	0	1	1	1	1		Palliative	1	1	4.10959
61.3068	1	4	1	1	0	1	1.84619	139.077	0.279221	524.319	1.05266	298.956	46.0102	3.48045	0	0	0	0	0	0	1	1	Palliative	1	0	68.6795
49.0959	0	3	1	1	1	0	2.46931	172.497	0.243446	721.039	1.0176	297.14	55.4639	0.774468	1	1	1	0	0	0	0	0	Adjuvant	0	0	69.9616
64.5123	1	2	0	0	0	1	2.20179	125.561	0.243511	616.502	1.19564	334.779	55.45	1.19639	1	0	1	0	1	1	0	0	Adjuvant	0	0	70.4877
32.6219	0	3	1	1	1	0	2.22216	115.183	0.298932	471.098	1.22263	259.198			1	0	0	0	1	0			Adjuvant	1	0	55.1342
47.8959	0	1	0	1	0	0	6.95	207.143	0.247929	2015.5	2.41235	699.58			1	1	1	1	1	1			Adjuvant	0	0	69.4685
46.1425	0	2	0	1	1	0	1.16917	113.557	0.163895	395.18	0.570356	192.78	61.3824	0.793548	0	0	1	0	0	0	0	0	Adjuvant	0	0	69.5342
47.263	0	3	1	0	0	0	2.94628	129.752	0.313116	925.132	2.23251	701.01	57.3	0.181416	1	0	0	1	1	1	0	0	Adjuvant	0	0	70.2247
40.9315	0	3	1	0	0	1	3.87591	205.839	0.578905	1093.01	3.07399	866.864	37.35	1.91475	1	1	0	1	1	1	1	1	Neoadjuvant	0	0	43.5616
46.5671	0	3	1	1	1	1	1.43229	131.771	0.167672	362.37	0.461098	116.658			0	0	1	0	0	0			Adjuvant	0	0	69.9616
41.5096	0	2	0	1	0	0	2.23932	274.359	0.391752	718.821	1.02639	329.471	51.85	0.0673913	1	1	0	0	0	0	1	0	Adjuvant	0	0	69.5342
43.1123	0	2	0	1	1	0	2.20786	107.058	0.184028	744.05	1.27899	431.021	49.4392	1.4451	1	0	1	0	1	1	1	0	Adjuvant	0	0	68.3836
57.6137	1	2	0	0	0	1	2.69048	205.952	0.29203	930.905	1.31997	456.711	52.3	1.69476	1	1	0	1	1	1	1	1	Adjuvant	0	0	68.2192
52.6219	1	3	1	1	1	0	1.39241	125.316	0.202848	413.544	0.669399	198.811	57.65	0.39738	0	0	1	0	0	0	0	0	Adjuvant	1	1	5.91781
59.7452	1	2	0	0	0	0	1	116.129	0.0904047	396	0.30828	122.079	61.45	1.2027	0	0	1	0	0	0	0	0	Adjuvant	0	0	69.074
50.337	1	3	1	1	1	0	2.35921	159.274	0.189286	691.248	0.8215	240.699	32.898	0.109705	1	1	1	0	0	0	1	0	Adjuvant	0	0	4.60274
45.4986	0	4	1	1	1	0	3.26923	278.205	0.412359	709.423	1.05152	228.179	38.1	1.61988	1	1	0	0	0	0	1	1	Palliative	0	0	67.3315
54.8082	1	3	1	1	1	0	1.70588	122.941	0.155294	356.529	0.450353	94.1238	47.1	0.580311	0	0	1	0	0	0	1	0	Adjuvant	1	1	16.1753
45.463	0	4	1	1	1	1	4.48	184.571	0.28616	1447.04	2.24349	724.649	41.75	8.84242	1	1	0	1	1	1	1	1	Palliative	0	0	16.1753
56.063	1	4	1	1	0	0	2.93233	218.797	0.338391	853.308	1.31972	384.04	51.15	0.611236	1	1	0	1	1	1	1	0	Palliative	1	0	36.8877
54.4959	1	3	1	1	1	0	2.16892	263.514	0.161007	845.878	0.516832	201.564	44.8	32.2888	1	1	1	1	0	0	1	1	Neoadjuvant	0	0	15.2219
51.8575	1	3	1	1	1	1	2.86547	107.623	0.219605	687.713	1.40328	336.787	52.05	1.20049	1	0	1	0	1	1	1	0	Adjuvant	0	0	69.1068
63.2082	1	4	1	1	1	0	0.944444	70.915	0.166833	204.944	0.482148	104.626	57.9	2.52582	0	0	1	0	0	0	0	1	Palliative	1	0	43.5945
48.7671	0	3	1	1	0	0	1.57934	80.4428	0.163299	344.295	0.698919	152.364	62.05	0.183505	0	0	1	0	0	0	0	0	Adjuvant	0	0	67.989
59.9836	1	2	0	1	1	0	2.47674	106.395	0.242994	453.244	1.03516	189.433	54	1.70925	1	0	1	0	0	0	1	1	Adjuvant	1	1	24.9534
70.2493	1	3	1	0	0	1	1.42478	109.292	0.348009	351.92	1.12059	276.785	45.9	4.06936	0	0	0	0	1	0	1	1	Adjuvant	1	1	16.5699
48.9041	0	3	1	0	0	0	2.60821	112.687	0.224384	787.679	1.56845	473.671	54.6	1.51456	1	0	1	1	1	1	0	1	Adjuvant	1	1	21.3699
46.2438	0	3	1	1	1	0	2.26316	107.177	0.268033	506.947	1.2678	283.987	55.55	0.0997783	1	0	0	0	1	0	0	0	Adjuvant	0	0	67.9233
42.8904	0	4	1	1	1	1	1.91716	211.243	0.214615	684.426	0.695354	248.241	50.65	3.72275	0	1	1	0	0	0	1	1	Palliative	1	1	15.6493
49.874	0	4	1	0	0	1	7.85	633.75	0.846075	3979.95	5.31335	2693.87			1	1	0	1	1	1			Palliative	1	1	1.70959
57.4822	1	4	1	1	1	0	2.70229	116.794	0.381344	413.45	1.34996	206.543	41.15		1	0	0	0	1	0	1		Palliative	0	0	65.9178
56	1	2	0	0	0	1	1.35429	144	0.234754	341.28	0.556368	140.205	58.15	1.01619	0	0	1	0	0	0	0	0	Adjuvant	0	0	55.4301
56.7918	1	1	0	1	1	0	2.37066	127.027	0.209514	779.946	1.28641	423.23	51.55	2.67876	1	0	1	1	1	1	1	1	Adjuvant	0	0	66.7726
42.8466	0	3	1	1	1	0	1.88667	196	0.21376	554.68	0.604941	177.853	52.4		0	1	1	0	0	0	1		Adjuvant	1	0	41.9836
44.7836	0	2	0	1	1	0	1.67606	150.704	0.174169	538.014	0.621783	199.592	59.75	0.95723	0	1	1	0	0	0	0	0	Adjuvant	0	0	12.0329
59.1397	1	3	1	1	1	0	2.63158	215.263	0.259368	1076.32	1.29684	530.408	46.6	1.25876	1	1	1	1	1	1	1	0	Neoadjuvant	0	0	66.3452
49.3863	0	2	0	1	1	0	2.53368	209.326	0.301078	1023.61	1.47227	594.797	52.05	0.641509	1	1	0	1	1	1	1	0	Neoadjuvant	0	0	48.6904
40.6986	0	2	0	1	0	0	3.31783	274.419	0.371271	1174.51	1.58904	562.521	54.25	0.106695	1	1	0	1	1	1	0	0	Adjuvant	0	0	68.811
53.2575	1	4	1	1	1	0	3.02273	247.727	0.282182	1317.91	1.50121	654.526	51	2.32938	1	1	0	1	1	1	1	1	Palliative	1	1	19.7589
43.3644	0	4	1	1	1	0	3.38468	233.246	0.320522	907.095	1.24651	334.065	35.545		1	1	0	1	1	1	1		Palliative	1	1	5.49041
50.0438	1	3	1	0	0	1	2.66412	175.573	0.566	612.748	1.97534	454.328	51.25	0.261745	1	1	0	0	1	1	1	0	Adjuvant	1	1	33.8301
62.8959	1	4	1	1	1	0	1.62595	219.084	0.410634	466.649	0.87465	251.024	47.55	0.709756	0	1	0	0	0	0	1	0	Palliative	0	0	69.337
63.674	1	4	1	1	1	1	2.59538	227.746	0.44511	1022.58	1.99854	787.426	43.25	20.8931	1	1	0	1	1	1	1	1	Palliative	1	0	38.3342
52.8849	1	3	1	1	1	0	1.69444	115.806	0.0833333	501.556	0.360917	106.831	56.78	3.18409	0	0	1	0	0	0	0	1	Adjuvant	0	0	65.1616
31.7425	0	3	1	0	0	0	1.39431	84.1463	0.129472	288.622	0.444087	91.9261	59.8	0.202105	0	0	1	0	0	0	0	0	Adjuvant	0	0	58.0932
51.0384	1	4	1	1	1	0	1.86624	242.675	0.249076	711.038	0.729794	278.051	43.25	3.25424	0	1	1	0	0	0	1	1	Palliative	1	1	24.7562
45.0521	0	2	0	1	1	0	1.63248	162.393	0.202222	620.342	0.772489	293.546	51.9		0	1	1	0	0	0	1		Adjuvant	0	0	65.0959
58.2466	1	2	0	1	1	0	0.723684	71.7105	0.137842	157.763	0.303253	66.1091	50.5	3.12181	0	0	1	0	0	0	1	1	Adjuvant	0	0	62.6959
51.8356	1	2	0	1	1	0	1.76856	116.157	0.243441	470.437	0.985936	262.259	49.25		0	0	1	0	0	0	1		Adjuvant	0	0	63.1562
56.3808	1	3	1	0	0	0	2.03409	146.591	0.228563	524.795	0.818254	211.109	52.2	3.2212	1	1	1	0	0	0	1	1	Adjuvant	1	1	12.4274
56.6082	1	2	0	0	0	0	3.63636	107.867	0.353535	938.182	3.07491	793.327	54.8592	2.09324	1	0	0	1	1	1	0	1	Adjuvant	1	1	28.9644
47.0877	0	3	1	1	1	0	1.42414	115.862	0.144124	478.51	0.595233	199.998	60.1	2.55263	0	0	1	0	0	0	0	1	Adjuvant	0	0	61.7425
53.7233	1	2	0	1	1	0	2.2398	276.02	0.276964	1211.73	1.21587	657.787	48.4	39.3083	1	1	0	1	1	1	1	1	Adjuvant	0	0	63.2877
61.3041	1	4	1	0	0	0	4.39412	242.941	0.328706	1814.77	2.45543	1014.09	45		1	1	0	1	1	1	1		Palliative	1	1	2.46575
37.8466	0	4	1	0	0	0	1.72766	117.447	0.221055	476.834	0.897485	247.706	55.95	0	0	0	1	0	0	0	0	0	Palliative	1	1	22.3233
55.8658	1	3	1	1	1	0	4.46789	341.284	0.412367	1662.06	2.00823	747.061	49.95	3.36404	1	1	0	1	1	1	1	1	Adjuvant	1	0	37.0849
55.9479	1	3	1	0	0	1	3.60563	185.211	0.262014	948.282	1.34151	352.818	53.5	1.41379	1	1	1	1	1	1	1	0	Adjuvant	1	1	33.2384
46.1836	0	3	1	0	0	0	2.57711	134.328	0.308896	695.821	1.60008	432.021	53.95	6.26651	1	0	0	0	1	1	1	1	Adjuvant	0	0	62.7288
44.3096	0	4	1	0	1	1	5.12977	74.0458	0.458771	497.588	3.08294	299.045	34.25		1	0	0	0	1	0	1		Palliative	1	1	1.70959
61.8575	1	4	1	1	1		1.05067	79.4667	0.185544	313.099	0.731043	217.851	66.35	0.972689	0	0	1	0	0	0	0	0	Palliative	0	0	62.926
51.326	1	1	0	1	0	0	1.99248	210.526	0.0888421	557.895	0.235432	65.9208			0	1	1	0	0	0			Adjuvant	0	0	60.5918
44.6247	0	3	1	1	1	0	3.75862	280.172	0.481672	1221.55	2.10009	682.53	52.9	0.280255	1	1	0	1	1	1	1	0	Neoadjuvant	1	0	36.9534
50.7973	1	2	0	1	1		2.79032	207.527	0.283129	1077.06	1.46944	567.204	55.8	0.0537634	1	1	0	1	1	1	0	0	Adjuvant	0	0	61.9726
37.1151	0	3	1	1	1	0	3.95	174.342	0	1046.75	0	0	54.1	0.111828	1	1	1	1	0	0	0	0	Adjuvant	0	0	61.7096
58.5425	1	3	1	1	1	0	2.20087	137.555	0.281004	693.275	1.41626	446.123	57.75	0.425486	1	0	0	0	1	1	0	0	Adjuvant	0	0	61.5123
67.7562	1	2	0	1	1	0	1.01024	69.2833	0.183287	205.078	0.542529	110.133	57.75	1.58933	0	0	1	0	0	0	0	1	Adjuvant	0	0	59.2438
72.3781	1	4	1	0	0	0	2.64754	156.557	0.393721	505.68	1.27172	242.898	44.1		1	1	0	0	1	0	1		Palliative	0	0	59.1781
41.5397	0	3	1	1	0	0	1.86705	118.497	0.149272	382.746	0.482148	98.8402	54.55	1.06754	0	0	1	0	0	0	0	0	Adjuvant	1	1	25.5452
43.337	0	2	0	1	1	0	5.25581	196.124	0.471233	1329.72	3.19496	808.324	53.85	0.386076	1	1	0	1	1	1	1	0	Adjuvant	0	0	62.926
45.2521	0	4	1	1	1	0	2.79487	114.359	0.266174	623.256	1.45065	323.495	55.45	2.10503	1	0	0	0	1	0	0	1	Palliative	0	0	64.7014
48.7808	0	3	1	0	0	0	3.60403	134.564	0.106235	1445.21	1.14096	457.526	52.5	10.4707	1	0	1	1	1	1	1	1	Neoadjuvant	0	0	58.2575
60.7288	1	4	1	0	0	1	1.88462	126.282	0.318981	371.269	0.937803	184.747	49.9	0.931116	0	0	0	0	0	0	1	0	Palliative	0	0	61.1178
47.926	0	2	0	1	1	0	8.14141	270.27	0.545455	1612	3.25331	644.155	47.263	0.100917	1	1	0	1	1	1	1	0	Adjuvant	0	0	62.0384
63.1534	1	3	1	0	0	1	0.95057	124.715	0.323194	311.787	0.807985	265.019	52.85	1.13854	0	0	0	0	0	0	1	0	Adjuvant	0	0	13.4137
70.8384	1	4	1	0	0	1	0.530792	90.6158	0.125252	164.015	0.226706	70.0523	65.35	1.91925	0	0	1	0	0	0	0	1	Palliative	1	0	43.8575
65.8685	1	3	1	1	1	0	1.82051	124.615	0.444605	442.385	1.57835	383.539	55.15	2.69824	0	0	0	0	1	1	0	1	Adjuvant	0	0	57.6658
61.4493	1	3	1	0	0	1	3.46995	192.896	0.0638033	1224.89	0.405151	143.018	51.45	1.62648	1	1	1	1	0	0	1	1	Adjuvant	1	1	17.4904
51.3945	1	3	1	1	1	0	1.62717	126.916	0.263006	493.032	1.0217	309.575	59.637	1.80084	0	0	1	0	0	0	0	1	Adjuvant	0	0	59.3753
56.8658	1	2	0	1	1	0	1.45506	71.6292	0.409382	371.039	2.1206	540.753	60.8	7.54651	0	0	0	0	1	1	0	1	Adjuvant	0	0	60.789
61.1425	1	3	1	0	0	0	1.73457	178.395	0.194198	501.29	0.545695	157.706	54.2	0.0932755	0	1	1	0	0	0	0	0	Adjuvant	0	0	58.4548
52.4685	1	4	1	1	1	0	1.50909	97.7273	0.222909	324.455	0.740058	159.113	41.1	6.42525	0	0	1	0	0	0	1	1	Palliative	1	1	14.3342
53.0877	1	2	0	0	0	0	2.11458	126.562	0.145063	513.844	0.588954	143.116	54.3	0.210291	1	0	1	0	0	0	0	0	Adjuvant	0	0	57.2055
51.8658	1	2	0	0	0	1	1.70455	115.909	0.245255	434.659	0.919705	234.525	58.1	4.78556	0	0	1	0	0	0	0	1	Adjuvant	0	0	57.4356
48.3288	0	2	0	0	0	0	5.32812	318.75	1.19995	1086.94	4.09184	834.735	50.7	19.6758	1	1	0	1	1	1	1	1	Adjuvant	0	0	58.2904
39.1836	0	4	1	1	1	1	3.22124	223.009	0.186956	811.752	0.680519	171.491	38.75	1.81571	1	1	1	1	0	0	1	1	Palliative	1	1	17.7863
47.4137	0	3	1	1	1	0	2.31624	148.291	0.307675	803.735	1.6676	578.657	63.3	0.0193798	1	1	0	1	1	1	0	0	Adjuvant	1	1	20.1863
41.526	0	2	0	1	1	0	1.69663	130.899	0.255994	395.315	0.773103	180.133	59	0.0998004	0	0	1	0	0	0	0	0	Adjuvant	0	0	55.5945
39.1014	0	3	1	0	0	0	2.656	270.4	0.32768	897.728	1.0879	367.709	54.25	0.0208333	1	1	0	1	0	1	0	0	Adjuvant	0	0	56.0548
52.8301	1	2	0	1	1	0	2.42683	217.683	0.0743963	866.378	0.296097	105.707			1	1	1	1	0	0			Adjuvant	0	0	59.0137
41.2849	0	2	0	0	0	0	5.5375	412.5	0.503212	1827.37	2.22923	735.646			1	1	0	1	1	1			Adjuvant	0	0	54.8055
70.2384	1	4	1	0	0	1	3.37342	195.57	0.264532	1042.39	1.40995	435.676	45.8		1	1	1	1	1	1	1		Palliative	0	0	9.20548
37.274	0	2	0	1	1	1	3.89542	167.32	0.954425	997.229	5.68837	1456.22	56.85	0.0447154	1	1	0	1	1	1	0	0	Adjuvant	0	0	56.0548
45.4411	0	2	0	1	1	0	1.24121	121.608	0.271146	300.372	0.66973	162.075	47.85	1.27177	0	0	0	0	0	0	1	0	Adjuvant	0	0	54.8384
56.7151	1	2	0	0	0	1	2.8009	247.059	0.199059	1529.29	1.23217	672.767	57.85	0.211538	1	1	1	1	1	1	0	0	Adjuvant	1	1	17.6219
55.863	1	4	1	1	0	0	3.35238	367.619	0.3984	1294.02	1.40237	541.314	55.75	2.33465	1	1	0	1	1	1	0	1	Palliative	0	0	50.7945
39.1753	0	2	0	0	0	0	5.56818	523.864	0.508295	2566.93	2.49065	1148.19	54.8	0.196429	1	1	0	1	1	1	0	0	Adjuvant	0	0	55.2986
55.4548	1	4	1	0	0	1	2.45455	191.818	0.280391	517.909	0.757055	159.739	49.8		1	1	0	0	0	0	1		Palliative	1	1	22.7507
66.4658	1	3	1	1	1	0	1.85287	103.741	0.168566	770.793	1.25245	521.018	69.65	6.53024	0	0	1	0	1	1	0	1	Adjuvant	0	0	52.7014
58.9151	1	2	0	0	0	1	1.56869	107.987	0.123498	530.217	0.606377	204.955	64.85	0.686992	0	0	1	0	0	0	0	0	Adjuvant	0	0	51.4192
57.5507	1	1	0	1	1		1.70647	103.98	0.208373	356.652	0.71472	149.376	53.65	1.8578	0	0	1	0	0	0	1	1	Adjuvant	0	0	48.789
33.0795	0	3	1	0	0	0	2.15979	157.216	0.221361	658.737	0.927502	282.888	58.9	2.6626	1	1	1	0	0	0	0	1	Neoadjuvant	1	1	18.4767
44.2438	0	3	1	0	0	1	1.74227	153.608	0.13268	519.196	0.44846	133.641	56.7	0.0212766	0	1	1	0	0	0	0	0	Adjuvant	1	1	12.6904
43.4	0	3	1	1	1	1	3.42775	154.913	0.346266	918.636	2.05336	550.3	58.15	2.73939	1	1	0	1	1	1	0	1	Adjuvant	0	0	22.389
61.0411	1	3	1	1	1	0	3.48503	192.814	0.281317	1122.18	1.63727	527.2	58.15	0.427711	1	1	0	1	1	1	0	0	Adjuvant	0	0	51.6822
35.674	0	3	1	0	0	0	1.77778	134.343	0.258222	472.889	0.908942	241.779	46.5	0.13388	0	0	1	0	0	0	1	0	Adjuvant	0	0	54.4438
57.1123	1	3	1	1	1	1	1.86869	160.101	0.272727	592.374	1.00909	319.882	53.8	5.40319	0	1	0	0	0	0	1	1	Adjuvant	1	1	29.6877
43.2575	0	3	1	1	1	0	1.96262	144.393	0.239565	606.449	1.00617	310.908	56.7	0.326087	0	0	1	0	0	0	0	0	Neoadjuvant	0	0	48.6575
49.8137	0	3	1	0	0	1	2.10843	167.47	0.28453	586.145	0.995855	276.848	52.3	0.377273	1	1	0	0	0	0	1	0	Adjuvant	1	1	16.7342
55.6301	1	2	0	1	1	0	2.46919	138.863	0.317896	723.474	1.65624	485.277	50.55	3.7225	1	0	0	0	1	1	1	1	Neoadjuvant	0	0	48.0986
49.3123	0	3	1	1	1	1	1.15068	109.589	0.437361	276.164	1.10215	264.516	50.35	0.0659898	0	0	0	0	0	0	1	0	Adjuvant	0	0	48.6575
39.0603	0	4	1	0	0	1	8.55224	489.552	1.42351	2805.13	8.1567	2675.4	39.35	5.08889	1	1	0	1	1	1	1	1	Palliative	1	1	8.84384
47.6767	0	4	1	0	0	1	2.00542	204.065	0.214276	1510.08	1.58565	1193.99	43.45	1.824	1	1	1	1	1	1	1	1	Palliative	1	1	6.57534
66.7397	1	2	0	1	1	0	2.75248	150	0.261386	834	1.45331	440.352	56.1	0.00869565	1	1	1	1	1	1	0	0	Adjuvant	0	0	47.211
57.3507	1	2	0	0	0	1	3.29213	185.955	0.1395	1089.7	0.81747	270.583	57.9	1.87959	1	1	1	1	0	0	0	1	Adjuvant	0	0	48.9863
26.4082	0	4	1	1	1	0	2.02395	254.491	0.346707	860.18	1.17187	498.044	43.55		1	1	0	1	1	1	1		Palliative	1	1	0.690411
57.6548	1	4	1	1	1	0	2.15102	120.816	0.151816	636.702	0.800072	236.821	52.25	0.505	1	0	1	0	0	0	1	0	Palliative	1	1	18.8712
54.5534	1	2	0	0	0	0	3.95455	192.045	0.433432	668.318	1.50834	254.91	47.3	0.909091	1	1	0	0	1	0	1	0	Adjuvant	0	0	49.3479
58.9178	1	3	1	1	0	1	4.09804	181.046	0.477386	1135.16	2.99321	829.119	52.65	0.0644444	1	1	0	1	1	1	1	0	Adjuvant	0	0	46.2575
58.0466	1	4	1	1	0	0	2.81818	38.2328	0.361088	152.182	1.43727	77.6127	54.162	7.8811	1	0	0	0	1	0	0	1	Palliative	1	1	16.5041
51.6521	1	3	1	0	0	0	2.95935	165.854	0.316333	603.707	1.15145	234.896	52.15	0.132609	1	1	0	0	1	0	1	0	Adjuvant	0	0	46.126
38.2	0	4	1	1	1	1	3.80612	275.51	0.237041	1027.65	0.884162	238.724	52.9	0.0520833	1	1	1	1	0	0	1	0	Palliative	0	0	46.3233
48.2795	0	4	1	1	1	0	2.73684	125.506	0.270713	848.421	1.83002	567.305	49.55	2.42204	1	0	0	1	1	1	1	1	Palliative	1	1	2.89315
44.5671	0	3	1	1	1	0	6.75	500	0.694895	2565	3.56481	1354.63	55	0.0742188	1	1	0	1	1	1	0	0	Adjuvant	0	0	47.0466
36.6466	0	2	0	0	0	0	3.63393	254.464	0.484732	1035.67	1.97286	562.265	41.3		1	1	0	1	1	1	1		Adjuvant	0	0	32.811
49.5397	0	2	0	1	1	1	2.86885	201.639	0.270361	705.738	0.946262	232.781	46.1	0.545	1	1	0	0	0	0	1	0	Adjuvant	0	0	45.3041
69.1644	1	4	1	1	1	1	2.01653	133.058	0.241021	649.322	1.17618	378.73	50.1	0.628947	1	0	1	0	1	1	1	0	Palliative	1	1	5.7863
55.5342	1	3	1	1	1	0	1.52874	162.069	0.168659	646.655	0.672949	284.658	61.05		0	1	1	0	0	0	0		Adjuvant	1	1	32.9096
44.4219	0	3	1	1	1	0	2.74219	207.812	0.242914	729.422	0.852628	226.799	49.4	0.0255814	1	1	1	0	0	0	1	0	Adjuvant	0	0	6.34521
61.3808	1	3	1	0	0	1	3.56667	188	0.3129	1005.8	1.67402	472.072	55.5	0.95	1	1	0	1	1	1	0	0	Neoadjuvant	1	0	41.9507
51.4986	1	4	1	1	1	0	2.55	57.5356	0.75	288.15	3.75615	424.445	50.82	4.90732	1	0	0	0	1	1	1	1	Palliative	1	1	35.474
47.6603	0	1	0	0	0	0	4.51832	110.995	0.240634	957.885	2.07667	440.253	48.15	0.181347	1	0	1	1	1	1	1	0	Adjuvant	0	0	47.0795
69.1068	1	3	1	0	0	1	2.61146	162.42	0.336306	665.924	1.37885	351.608	50.85	0.87907	1	1	0	0	1	1	1	0	Adjuvant	1	1	19.8247
57.7315	1	3	1	0	0	1	2.36923	111.154	0.137385	684.708	0.846289	244.578	55.6	5	1	0	1	0	0	0	0	1	Adjuvant	1	1	15.0575
55.2904	1	4	1	1	1	0	3.37634	255.914	0.298742	803.57	0.93805	223.256	50.65		1	1	0	1	0	0	1		Palliative	1	1	28.5699
58.2356	1	2	0	1	1	0	3.95968	227.419	0.379355	1116.63	1.86263	525.262	53.2		1	1	0	1	1	1	1		Adjuvant	1	1	4.76712
46.0603	0	2	0	1	1	0	0.873112	93.6556	0.12329	270.665	0.356308	110.456	68.05	0.260194	0	0	1	0	0	0	0	0	Adjuvant	0	0	39.7808
61.6137	1	3	1	0	0	1	1.23446	85.5932	0.129266	374.042	0.56489	171.162	61.6	1.59909	0	0	1	0	0	0	0	1	Adjuvant	1	1	3.78082
40.9863	0	3	1	1	0	1	5.64706	430.588	0.495012	2066.82	2.37606	869.637	45.25	0.470732	1	1	0	1	1	1	1	0	Adjuvant	0	0	39.5836
46.7315	0	3	1	1	0	0	3.29412	356.303	0.394773	1396.71	1.54751	656.144	48.75	0.691589	1	1	0	1	1	1	1	0	Adjuvant	0	0	41.4904
54.2411	1	4	1	1	0	0	5.54839	229.032	0.593129	2363.61	6.12109	2607.59	42.3	15.2091	1	1	0	1	1	1	1	1	Palliative	0	0	8.02192
52.1808	1	4	1	1	1	1	7.86842	889.474	0.287368	2659.53	0.859232	290.42	46.9	1.11333	1	1	0	1	0	0	1	0	Palliative	0	0	39.8137
56.1342	1	1	0	0	0	0	3.73585	275.472	0.700132	1090.87	2.77252	809.577	51.3	1.4913	1	1	0	1	1	1	1	0	Adjuvant	0	0	26.3014
46.4685	0	3	1	1	1	1	5.83784	420.27	0.433662	1815.57	1.87342	582.634	44.7	0.431707	1	1	0	1	1	1	1	0	Adjuvant	0	0	36.3
45.1014	0	2	0	1	1	0	3.52525	289.899	0.495778	1011.75	1.73026	496.586	47.95	4.47674	1	1	0	1	1	1	1	1	Neoadjuvant	0	0	36
58.4192	1	3	1	1	1	0	4.38298	450	0.327064	1854	1.3475	569.994	47.7	3.1814	1	1	0	1	1	1	1	1	Adjuvant	0	0	37
43.4658	0	3	1	1	1	0	3.45205	313.699	0.254658	1581.04	1.28347	587.831	57.2	0.653307	1	1	1	1	1	1	0	0	Neoadjuvant	0	0	36.3
61.3479	1	3	1	0	0	0	3.7875	191.25	0.353844	1158.97	2.14429	656.154			1	1	0	1	1	1			Neoadjuvant	1	1	30.8384
32.0575	0	2	0	0	0	1	3.5082	219.126	0.26929	1406.79	1.72884	693.265	56.55	2.01477	1	1	0	1	1	1	0	1	Adjuvant	0	0	36
63.3452	1	2	0	0	0	0	5.26812	281.884	0.44087	2049.3	3.20512	1246.79	47.4	0.950617	1	1	0	1	1	1	1	0	Adjuvant	0	0	31.1014
